# Supplementary material for: A convenient method for the measurements of transverse relaxation rates in homonuclear scalar coupled spin systems
Source: Royal Society of Chemistry journal article supplement (doi:10.1039/c1cc13042k), 2011-01-01
Supplement: c1cc13042k.pdf [file c1cc13042k.pdf]

# A convenient method for the measurements of accurate transverse relaxation rates in homonuclear scalar coupled spin systems

Caroline Barrère, Pierre Thureau, André Thévand and Stéphane Viel

## Electronic Supplementary Information

### 1 Experimental parameters

Experiments were performed on a 9.4 T Bruker Avance II NMR spectrometer using a 5 mm  $^{13}\text{C}/^1\text{H}$  probe. The sample was prepared dissolving 5 mg of uracil into 500  $\mu\text{L}$  of DMSO- $\text{d}_6$  and 100  $\mu\text{L}$  of  $\text{D}_2\text{O}$ . The dissolved oxygen was not removed. For the results shown in Fig. 2 and 3, the recycle delay was adjusted to ensure full recovery of the magnetization and was set to 18 s. The  $^1\text{H}$   $90^\circ$  pulse length was 9  $\mu\text{s}$ .

In all cases, the experimental  $^1\text{H}$  signal amplitudes were estimated by integrating the spectral peaks. These amplitudes were normalized against the peak integral for  $\tau = 4 \mu\text{s}$ . The confidence limits on the determined relaxation rates  $R_2$  were determined by non-linear fitting to the mono-exponential decay formula.

### 2 Phase Cycling

The ZQ- and DQ-filtered signals are obtained from separate experiments. The same result can be obtained with a unique experiment multiplied by appropriate weights. The pulse phases are given in the following table:

|               |                                              |
|---------------|----------------------------------------------|
| $\phi_1$      | $90^\circ$                                   |
| $\phi_2$      | $0^\circ$                                    |
| $\phi_3$      | $90^\circ$                                   |
| $\phi_4$      | $0^\circ \ 90^\circ \ 180^\circ \ 270^\circ$ |
| $\phi_5$      | $0^\circ$                                    |
| $\phi_{RZQF}$ | $0^\circ \ 270^\circ \ 180^\circ \ 90^\circ$ |
| $\phi_{RDQF}$ | $0^\circ \ 90^\circ \ 180^\circ \ 270^\circ$ |

**Table 1:** Phase cycling for ZQ- or DQ-filtered pulse sequence shown in Fig. 1. Phases are given for the 5 radiofrequency pulses, in order from left to right, and for the receiver phase. A four-step phase cycle can be added to  $\phi_3$  and  $\phi_5$  to ensure the sign change of the coherences order, giving rise to a 64-step phase cycle. Data shown in Fig. 2 and 3 were obtained using the 4-step and 64-step phase cycles, respectively.

### 3 Impact of diffusion on $R_2$ measurements

In the presence of background gradient  $g_b$ , due to magnetic field inhomogeneity  $\Delta B_0$ , the signal intensity does not only depend on the relaxation rate but also on the molecular self-diffusion coefficient.

The signal loss induced by molecular diffusion can be estimated by measuring the NMR signal line width at half height  $\Delta\nu_{1/2}$ . Considering the worst case scenario, where the signal line width is only due to the magnetic field inhomogeneity, we can write:

$$\Delta\nu_{1/2} = \frac{\gamma\Delta B_0}{2\pi} \quad (1)$$

In addition, the background gradient is given by:

$$g_b = \frac{\Delta B_0}{L} \quad (2)$$

with  $L$  being the length of the coil active region. Thus, the background gradient can be rewritten according to:

$$g_b = \frac{1}{L} \frac{2\pi}{\gamma} \Delta\nu_{1/2} \quad (3)$$

Typically, for standard solution-state NMR probes we have  $L = 1$  cm and

$$\Delta\nu_{1/2} = 0.5 \text{ Hz.}$$

In a spin-echo experiment, the amplitude of the signal at the echo is given by:

$$\exp(-\tau R_2) \exp\left(-\frac{1}{12}\gamma^2 g_b^2 D\tau^3\right) \quad (4)$$

With  $D_{uracil} = 3.10^{-10} \text{ m}^2.\text{s}^{-1}$ , the term related to diffusion is equal to 0.997 at the largest  $\tau$  value (10 s) which basically means that the influence of diffusion can be neglected.

## 4 Strongly coupled spin system

A citric acid sample was used to illustrate the case of a strongly coupled spin system. 10 mg of citric acid were dissolved in  $\text{D}_2\text{O}$ . Each of the two  $\text{CH}_2$  groups forms a diastereotopic proton pair. If the labile-OH protons are ignored, the spin system classification is  $\text{AA}'\text{BB}'$ .

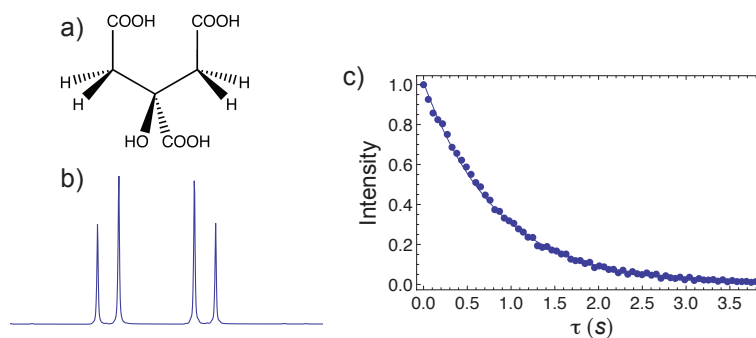

**Figure 1:** a) Citric acid molecular structure b) Experimental  $^1\text{H}$  NMR spectra of citric acid c) Experimental  $^1\text{H}$  ZQF+DQF signal amplitudes obtained as a function of  $\tau$  for a citric acid sample dissolved in  $\text{D}_2\text{O}$  mixture; The solid curve represents the best fit to the mono-exponential decay.

## 5 Uracil CPMG and Hahn-Echo curves

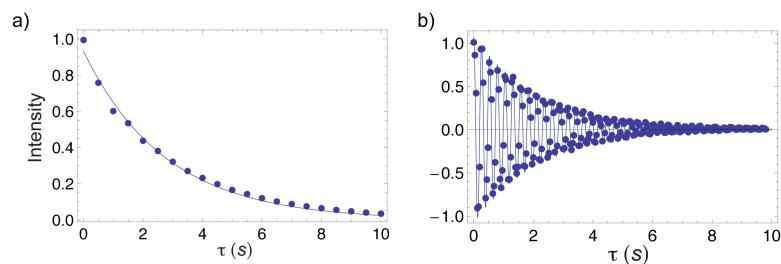

**Figure 2:** Experimental evolution as a function of  $\tau$  of the  $^1\text{H}$  signal amplitude of a uracil sample (proton  $\text{H}_1$ ) dissolved in a  $\text{DMSO-d}_6/\text{D}_2\text{O}$  mixture obtained with: a) The CPMG pulse sequence. The solid curve represents the best fit to the mono-exponential decay. b) The Hahn-Echo pulse sequence. The solid curve represents the best fit to the analytical function:  $\cos(\pi J\tau) \exp(-\tau R_2)$ .
